# Supplementary material
Source: PubMed Central journal article supplement (PMC9004365)
Supplement: NIHMS1789836-supplement-Supplementary_Data.pdf [file NIHMS1789836-supplement-Supplementary_Data.pdf]

# Supporting Information

## The Lysosomal Trafficking Regulator (LYST) is Necessary for Normal Wound Healing

Jacob C. Zbinden<sup>1,2†</sup>, Gabriel J. M. Mirhaidari<sup>1,3†</sup>, Kevin M. Blum<sup>1,2</sup>, Andrew J. Musgrave<sup>1</sup>, James W. Reinhardt<sup>1</sup>, Christopher K. Breuer<sup>1</sup>, Jenny C. Barker<sup>1,4\*</sup>

† These authors contributed equally to this work

\* Denotes corresponding author

E-mail: [Jenny.Barker@osumc.edu](mailto:Jenny.Barker@osumc.edu)

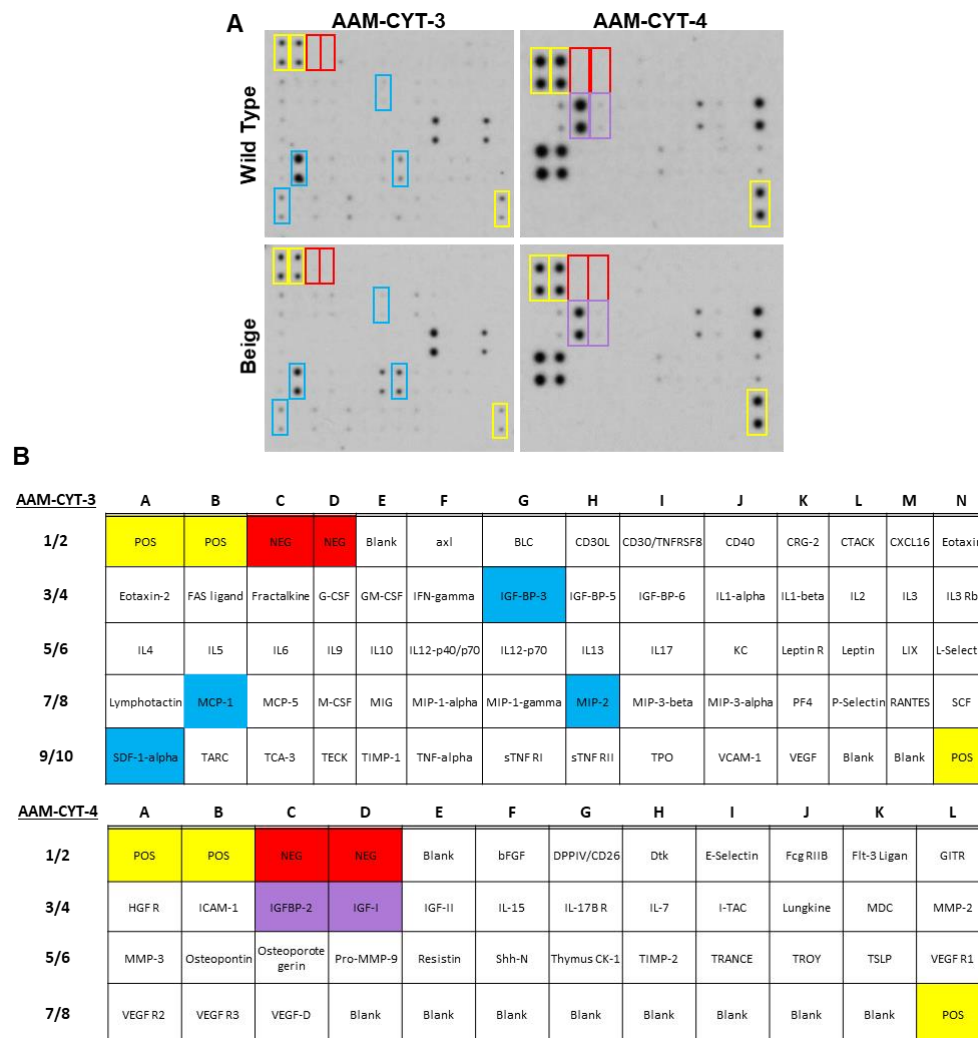

**Supplementary Figure 1. Cytokine array layout.** A) Representative protein array scan with labeled proteins of interest. B) Corresponding row and column information of array proteins.

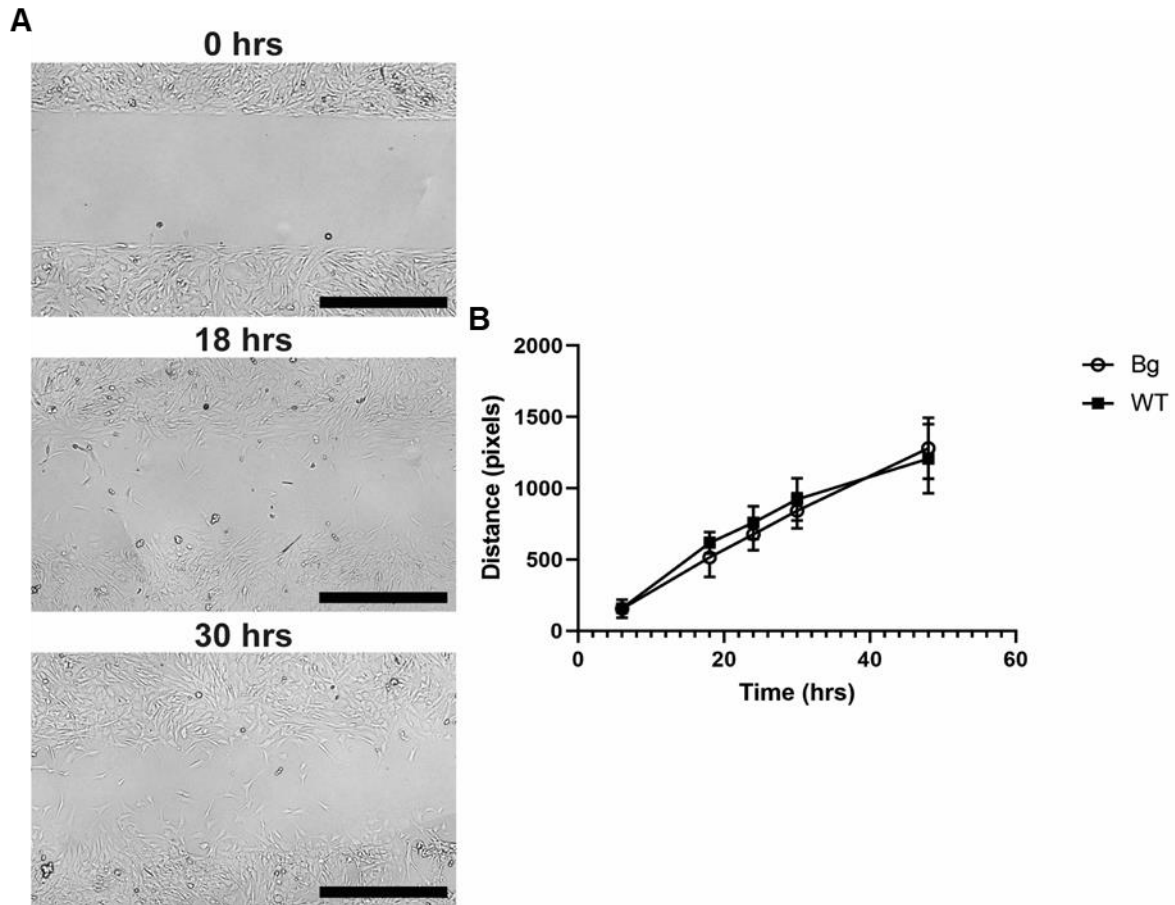

**Supplementary Figure 2. Fibroblast scratch assay.** A) Representative images from fibroblast scratch assay taken. Scale bar = 500  $\mu\text{m}$  B) Analysis of scratch assay comparing the average distance fibroblasts traveled over time. Linear regression analysis showed no significant differences in the rate of migration ( $p = 0.5169$ ).
